# Supplementary material
Source: HighWire-hosted journal article supplement (http://cmajopen.ca/highwire/filestream/80710/field_highwire_adjunct_files/1/open-2012-0020-2-at.pdf)
Supplement: open-2012-0020-2-at.pdf [file open-2012-0020-2-at.pdf]

Appendix 2: Detailed clinical features and demographics of 15 patients with mitochondrial disorders (as supplied by the authors)

| <b>Patient/Sex</b>               | <b>1F</b>       | <b>2M</b>         | <b>3F</b>       | <b>4M</b>                  | <b>5M</b>         | <b>6F</b>               | <b>7M</b>          | <b>8F</b>     | <b>9F</b>     | <b>10F</b>        | <b>11F</b>              | <b>12F</b>              | <b>13F</b>      | <b>14F</b>      | <b>15F</b>      | <b>AVG/<br/>TOTAL</b> |
|----------------------------------|-----------------|-------------------|-----------------|----------------------------|-------------------|-------------------------|--------------------|---------------|---------------|-------------------|-------------------------|-------------------------|-----------------|-----------------|-----------------|-----------------------|
| Mitochondrial disorder           | MELAS<br>A3243G | mtDNA<br>Deletion | MELAS<br>T3271C | Mitochondrial<br>Cytopathy | mtDNA<br>Deletion | Complex I<br>Deficiency | C9035T<br>Mutation | MELAS<br>3271 | MELAS<br>3271 | mtDNA<br>Deletion | Complex I<br>Deficiency | Complex I<br>Deficiency | MELAS<br>A3243G | MERRF<br>A8363G | MERRF<br>A8363G |                       |
| Age                              | 50              | 50                | 50              | 56                         | 57                | 35                      | 50                 | 39            | 60            | 52                | 41                      | 65                      | 64              | 48              | 58              | 52                    |
| Age at Diagnosis                 | 49              | 43                | 47              | 54                         | 56                | 29                      | 28                 | 29            | 46            | 47                | 32                      | 64                      | 51              | 47              | 50              | 45                    |
| <b>Clinical Features</b>         |                 |                   |                 |                            |                   |                         |                    |               |               |                   |                         |                         |                 |                 |                 |                       |
| Muscle weakness or atrophy       | +               | +                 | +               | +                          | +                 | +                       | +                  | +             | +             | +                 | +                       | -                       | +               | +               | +               | 14                    |
| Fatigue                          | -               | -                 | +               | +                          | +                 | +                       | -                  | +             | +             | +                 | +                       | -                       | +               | +               | -               | 10                    |
| Depression                       | +               | -                 | +               | -                          | -                 | +                       | +                  | +             | +             | +                 | +                       | +                       | +               | -               | -               | 10                    |
| Anxiety                          | +               | -                 | -               | +                          | +                 | +                       | -                  | +             | +             | +                 | +                       | -                       | -               | -               | +               | 9                     |
| White Matter Lesions on MRI      | +               | -                 | +               | +                          | +                 | -                       | -                  | -             | +             | +                 | -                       | +                       | +               | +               | -               | 9                     |
| Hearing loss                     | +               | -                 | +               | +                          | -                 | -                       | -                  | +             | +             | +                 | -                       | -                       | +               | +               | -               | 8                     |
| Stroke/stroke-like episodes      | -               | +                 | +               | -                          | -                 | -                       | -                  | +             | +             | +                 | +                       | +                       | +               | -               | -               | 8                     |
| Migraines or headaches           | -               | -                 | -               | -                          | -                 | +                       | -                  | +             | -             | +                 | +                       | -                       | +               | -               | +               | 6                     |
| Cognitive Impairment             | +               | -                 | +               | +                          | +                 | -                       | -                  | -             | -             | -                 | -                       | -                       | -               | +               | -               | 5                     |
| Type 2 Diabetes                  | +               | +                 | +               | -                          | -                 | -                       | -                  | -             | -             | -                 | -                       | -                       | +               | +               | -               | 5                     |
| Learning Disability              | +               | -                 | -               | -                          | -                 | -                       | +                  | +             | -             | -                 | +                       | -                       | -               | -               | -               | 4                     |
| Constipation                     | +               | -                 | -               | -                          | -                 | -                       | -                  | +             | +             | -                 | -                       | -                       | +               | -               | -               | 4                     |
| Dysphagia                        | -               | -                 | -               | -                          | -                 | -                       | +                  | +             | -             | -                 | -                       | -                       | -               | +               | -               | 3                     |
| Seizure disorder                 | -               | -                 | -               | -                          | -                 | -                       | -                  | +             | -             | -                 | +                       | -                       | -               | -               | -               | 2                     |
| Lipomas                          | -               | -                 | -               | -                          | -                 | -                       | -                  | -             | -             | -                 | -                       | -                       | -               | +               | +               | 2                     |
| Cataracts                        | -               | -                 | -               | +                          | -                 | -                       | -                  | -             | +             | -                 | -                       | -                       | -               | -               | -               | 2                     |
| Ptosis                           | -               | +                 | -               | -                          | -                 | -                       | -                  | -             | -             | +                 | -                       | -                       | -               | -               | -               | 2                     |
| Peripheral Neuropathy            | -               | -                 | -               | -                          | +                 | +                       | -                  | -             | -             | -                 | -                       | -                       | -               | -               | -               | 2                     |
| Short stature                    | +               | -                 | +               | -                          | -                 | -                       | -                  | -             | -             | -                 | -                       | -                       | -               | -               | -               | 2                     |
| Bipolar Disorder                 | -               | -                 | -               | -                          | -                 | -                       | -                  | -             | -             | -                 | -                       | -                       | -               | +               | -               | 1                     |
| Personality Disorder             | -               | -                 | +               | -                          | -                 | -                       | -                  | -             | -             | -                 | -                       | -                       | -               | -               | -               | 1                     |
| Dysarthria                       | -               | -                 | -               | -                          | -                 | -                       | -                  | -             | -             | +                 | -                       | -                       | -               | -               | -               | 1                     |
| Cardiomyopathy                   | -               | +                 | -               | -                          | -                 | -                       | -                  | -             | -             | -                 | -                       | -                       | -               | -               | -               | 1                     |
| Arrhythmia                       | -               | -                 | -               | -                          | -                 | -                       | -                  | -             | +             | -                 | -                       | -                       | -               | -               | -               | 1                     |
| Recurrent miscarriages           | +               | -                 | -               | -                          | -                 | -                       | -                  | -             | -             | -                 | -                       | -                       | -               | -               | -               | 1                     |
| Nystagmus                        | -               | -                 | -               | -                          | -                 | -                       | +                  | -             | -             | -                 | -                       | -                       | -               | -               | -               | 1                     |
| Ophthalmoplegia                  | -               | -                 | -               | +                          | -                 | -                       | -                  | -             | -             | -                 | -                       | -                       | -               | -               | -               | 1                     |
| Ataxia                           | -               | -                 | -               | -                          | -                 | -                       | -                  | -             | -             | +                 | -                       | -                       | -               | -               | -               | 1                     |
| <b>Mitochondrial Supplements</b> |                 |                   |                 |                            |                   |                         |                    |               |               |                   |                         |                         |                 |                 |                 |                       |
| Creatine                         | +               | +                 | +               | +                          | +                 | +                       | +                  | +             | +             | +                 | -                       | +                       | +               | +               | -               | 13                    |
| Alpha-lipoic acid                | +               | +                 | +               | +                          | +                 | +                       | +                  | +             | +             | +                 | -                       | +                       | +               | +               | -               | 13                    |
| Riboflavin                       | +               | +                 | +               | +                          | +                 | +                       | +                  | +             | +             | +                 | -                       | +                       | +               | +               | -               | 13                    |
| Vitamin C                        | +               | +                 | +               | +                          | +                 | +                       | +                  | +             | +             | +                 | -                       | +                       | +               | +               | -               | 13                    |
| Vitamin E                        | +               | +                 | +               | +                          | +                 | +                       | +                  | +             | +             | +                 | -                       | +                       | +               | +               | -               | 13                    |
| Coenzyme Q10                     | +               | +                 | +               | +                          | +                 | +                       | +                  | +             | +             | +                 | -                       | +                       | +               | +               | -               | 13                    |

Appendix to: Anglin RE, Rosebush PJ, Noseworthy MD. Metabolite measurements in the caudate nucleus, anterior cingulate cortex and hippocampus among patients with mitochondrial disorders: a case-control study using proton magnetic resonance spectroscopy.

*CMAJ Open* 2013. DOI:10.9788/cmajo.20120020

Copyright © 2013 The Author(s) or their employer(s).

To receive this resource in an accessible format, please contact us at [cmajgroup@cmaj.ca](mailto:cmajgroup@cmaj.ca).
